# Supplementary material for: Directly visualizing carrier transport and recombination at individual defects within 2D semiconductors
Source: Royal Society of Chemistry journal article supplement (doi:10.1039/d0sc07033e), 2021-01-01
Supplement: d0sc07033e4.pdf [file d0sc07033e4.pdf]

## Supporting Information

### *Directly Visualizing Carrier Transport and Recombination at Individual Defects within 2D Semiconductors*

Joshua W. Hill and Caleb M. Hill\*

Department of Chemistry, University of Wyoming, Laramie, WY 82071

\*caleb.hill@uwyo.edu

#### Table of Contents

|                                                                           |    |
|---------------------------------------------------------------------------|----|
| Theoretical Derivations .....                                             | 1  |
| Definition of Mathematical Symbols.....                                   | 1  |
| Steady-State Minority Carrier Profile.....                                | 2  |
| Carrier-Transport Limited SECCM Currents in 2D .....                      | 4  |
| Mass Transfer-Limited Currents in the SECCM Geometry .....                | 5  |
| Steady-State Model for CG-TC SECCM Responses.....                         | 5  |
| Estimation of $iR$ Drops in the SECCM Geometry.....                       | 6  |
| Additional Experimental Data .....                                        | 7  |
| Details on Finite Element Simulations .....                               | 8  |
| Theoretical Framework.....                                                | 8  |
| Values of Physical Constants Employed in Finite Element Simulations ..... | 9  |
| References.....                                                           | 9  |
| COMSOL Model Report .....                                                 | 10 |

#### Theoretical Derivations

##### Definition of Mathematical Symbols

| Symbol     | Definition                                                       |
|------------|------------------------------------------------------------------|
| $\epsilon$ | Dielectric Constant                                              |
| $\chi$     | Dimensionless Carrier Concentration, $C/R_g t_c$                 |
| $\varphi$  | Electric Potential                                               |
| $\tau$     | Dimensionless Time, $(t - t_0)/t_c$                              |
| $\sigma$   | Solution Conductivity                                            |
| $\rho$     | Dimensional Radial Distance from Beam Centroid, $r/L$            |
| $\nu$      | Frequency                                                        |
| $\beta$    | Kinetic Parameter                                                |
| $\alpha$   | Absorption Coefficient or Constant in Modified Bessel's Equation |
| $w$        | Layer Thickness                                                  |
| $t$        | Time                                                             |
| $r$        | Radial Distance from Beam Centroid                               |
| $n$        | Effective # of Electrons in Reaction                             |
| $m$        | Mass Transfer Coefficient                                        |
| $j$        | Current Density                                                  |
| $T$        | Temperature                                                      |
| $R$        | Solution Resistance                                              |

| Symbol       | Definition                                                    |
|--------------|---------------------------------------------------------------|
| $Q$          | Surface Charge Density                                        |
| $L$          | Carrier Diffusion Length                                      |
| $I$          | Beam Intensity                                                |
| $E_{fb}$     | Flat-Band Potential                                           |
| $E$          | Potential                                                     |
| $D$          | Diffusion Constant                                            |
| $C$          | Carrier Concentration                                         |
| $h$          | Planck's Constant                                             |
| $\epsilon_0$ | Vacuum Permittivity                                           |
| $\sigma_0$   | Beam Standard Deviation                                       |
| $\theta_p$   | Pipet Half-Angle                                              |
| $y_g$        | y-centroid of Beam                                            |
| $x_g$        | x-centroid of Beam                                            |
| $t_c$        | Carrier Lifetime                                              |
| $t_0$        | Carrier Generation Time                                       |
| $s_0$        | Dimensionless Beam Standard Deviation, $\sigma_0/L$           |
| $r_{sc}$     | Edge of Space Charge Layer in Semiconductor                   |
| $r_s$        | Inner Radius of Spherical Sector Approximating Pipet Geometry |
| $r_0$        | Pipet Radius                                                  |
| $q_e$        | Electronic Charge                                             |
| $n_D$        | Dopant Density                                                |
| $k_b$        | Boltzmann's Constant                                          |
| $k^0$        | Heterogeneous Rate Constant                                   |
| $i_{mt}$     | Mass Transport-Limited Current                                |
| $i_k$        | Kinetically-Limited Current                                   |
| $i_{ct}$     | Carrier Transport-Limited Current                             |
| $R_g$        | Carrier Generation Rate                                       |
| $P_0$        | Beam Power                                                    |
| $N_0$        | Beam Power in Photons/s                                       |
| $K_0$        | Modified Bessel's Function of the Second Kind                 |

Steady-State Minority Carrier Profile

Consider a semiconductor illuminated with a gaussian beam with an intensity which varies spatially as:

$$I = \frac{P_0}{2\pi\sigma_0^2 h\nu} e^{-\frac{(x-x_g)^2 + (y-y_g)^2}{2\sigma_0^2}} \quad S1$$

Where  $P_0$  is the power of the beam,  $\sigma_0$  is the standard deviation of the gaussian profile,  $h\nu$  is the photon energy, and  $x_g/y_g$  denote the centroid coordinates. Here,  $I$  is given in units of  $\text{cm}^{-2} \text{s}^{-1}$ . To a first approximation, the generation of carriers within a thin semiconducting layer of thickness  $w$  can be expressed as:

$$R_g = \frac{P_0(1 - e^{-\alpha w})}{2\pi\sigma_0^2 h\nu w} e^{-\frac{(x-x_g)^2 + (y-y_g)^2}{2\sigma_0^2}} \quad S2$$

Where  $\alpha$  is the absorption coefficient of the semiconductor. Illumination with a short pulse of duration  $dt_0$  results in an initial carrier distribution:

$$dC_0 = \frac{P_0(1 - e^{-\alpha w})dt_0}{2\pi\sigma_0^2 h\nu w} e^{-\frac{(x-x_g)^2 + (y-y_g)^2}{2\sigma_0^2}} \quad S3$$

Within the semiconductor, this distribution will evolve over time according via diffusion, following:

$$\frac{\partial C}{\partial t} = D\nabla^2 C - \frac{C}{t_c} \quad S4$$

Here,  $D$  is the diffusion coefficient of the carriers and  $t_c$  is the carrier lifetime. Using S3 as an initial condition results in the following well-known solution:<sup>1</sup>

$$dC = \frac{P_0(1 - e^{-\alpha w})dt_0}{2\pi[\sigma_0^2 + 2D(t - t_0)]h\nu w} e^{-\frac{(x-x_g)^2 + (y-y_g)^2}{2[\sigma_0^2 + 2D(t - t_0)]}} e^{-\frac{(t-t_0)}{t_c}} \quad S5$$

Here,  $t_0$  denotes the time at which the pulse is generated. An analogous solution for the case of steady-state illumination can be found through the principle of superposition. I.e., by integrating the above expression over all possible pulse times,  $t_0$ :

$$C = \frac{P_0(1 - e^{-\alpha w})}{2\pi h\nu w} \int_{-\infty}^t \frac{e^{-\frac{(x-x_g)^2 + (y-y_g)^2}{2[\sigma_0^2 + 2D(t-t_0)]}} e^{-\frac{(t-t_0)}{t_c}}}{[\sigma_0^2 + 2D(t - t_0)]} dt_0 \quad S6$$

Making the substitution  $\tau = (t - t_0)/t_c$  and defining a diffusion length as  $L = \sqrt{Dt_c}$  yields:

$$C = \frac{P_0(1 - e^{-\alpha w})}{2\pi h\nu w} \int_0^{\infty} \frac{e^{-\frac{(x-x_g)^2 + (y-y_g)^2}{2[\sigma_0^2 + 2L^2\tau]}} e^{-\tau}}{[\sigma_0^2 + 2L^2\tau]} d\tau \quad S7$$

Defining  $r^2 = (x - x_g)^2 + (y - y_g)^2$ ,  $N_0 = P_0/h\nu$ , and introducing dimensionless parameters  $\rho = r/L$ ,  $s_0 = \sigma_0/L$  allows the profile to be written as:

$$C(r) = \frac{N_0 t_c (1 - e^{-\alpha w})}{2\pi w L^2} \int_0^{\infty} \frac{e^{-\left[\frac{\rho^2}{2(s_0^2 + 2\tau)} + \tau\right]}}{s_0^2 + 2\tau} d\tau \quad S8$$

This expression describes the photogenerated carrier profile in the vicinity of a gaussian excitation source, assuming carriers move solely via 2D diffusion.

Carrier-Transport Limited SECCM Currents in 2D

Consider a thin semiconducting layer which is evenly illuminated (constant  $R_g$ ). In the absence of applied fields, the generation and transport of carriers within this system can be described via:

$$\frac{\partial C}{\partial t} = D\nabla^2 C - \frac{C}{t_c} + R_g \quad S9$$

In 2D, steady-state solutions to this equation will satisfy:

$$D \left[ \frac{\partial^2}{\partial r^2} + \frac{1}{r} \frac{\partial}{\partial r} \right] C - \frac{C}{t_c} + R_g = 0 \quad S10$$

Making the substitutions  $L = \sqrt{Dt_c}$ ,  $\rho = r/L$ , and  $\chi = C/R_g t_c$  allows this to be written as:

$$\rho^2 \frac{\partial^2 \chi}{\partial \rho^2} + \rho \frac{\partial \chi}{\partial \rho} - \rho^2 \chi = -\rho^2 \quad S11$$

This equation is an inhomogeneous variant of the modified Bessel's equation:

$$\rho^2 \frac{\partial^2 \chi}{\partial \rho^2} + \rho \frac{\partial \chi}{\partial \rho} - (\rho^2 + \alpha^2) \chi = 0 \quad S12$$

The general solution to the equation will thus be:

$$\chi = 1 + \gamma I_0(\rho) + \delta K_0(\rho) \quad S13$$

Where  $I_0$  and  $K_0$  are modified Bessel functions of the first and second kind, respectively and  $\gamma/\delta$  are constants. Requiring  $\chi \rightarrow 1$  as  $\rho \rightarrow \infty$  yields  $\gamma = 0$ .  $\delta$  can be evaluated by requiring the concentration to be 0 at  $\rho_{sc}$ , which would correspond to the edge of the space charge layer within the semiconductor. The solution is then:

$$\chi = 1 - \frac{K_0(\rho)}{K_0(\rho_{sc})} \quad S14$$

In explicit terms, the concentration profile under diffusion-limited transport is then:

$$C = R_g t_c \left[ 1 - \frac{K_0\left(\frac{r}{L}\right)}{K_0\left(\frac{r_{sc}}{L}\right)} \right] \quad S15$$

The current flowing can be calculated as:

$$i_{ct} = 2\pi q_e D r_0 w \left. \frac{\partial C}{\partial r} \right|_{r=r_{sc}} \quad S16$$

For small  $x$ ,  $K_0(x) \approx -\ln(x)$ , making the flux:

$$\frac{\partial C}{\partial r} \approx \frac{R_g t_c}{r \ln\left(\frac{L}{r_{sc}}\right)} \quad S17$$

And the current is then:

$$i_{ct} \approx \frac{2\pi q_e R_g w L^2}{\ln\left(\frac{L}{r_{sc}}\right)} \quad S18$$

Mass Transfer-Limited Currents in the SECCM Geometry

Consider a conical pipet with terminal radius  $r_0$  and half-angle  $\theta_p$ . The mass transfer-limited currents in this system can be approximated by considering diffusion within a spherical sector which approximates the pipet geometry. The radius of the sector ( $r_s$ ) subtended by the pipet geometry can be approximated as:

$$r_s = \frac{r_0}{\tan \theta_p} \quad S19$$

This approximation effectively ignores transport through the meniscus created through pipet contact. Because the system can be approximated in a spherical geometry, the mass transfer coefficient is simply:

$$m = \frac{D_r}{r_s} \quad S20$$

where  $D_r$  is the diffusion coefficient for redox species in solution. The effective surface area is:

$$A = 2\pi[1 - \cos \theta_p]r_s^2 \quad S21$$

The current can then be evaluated as:

$$i = nq_e A m C_r^* = \frac{2\pi n q_e D_r C_r^* r_0 [1 - \cos \theta_p]}{\tan \theta_p} \quad S22$$

where  $C_r^*$  is the bulk concentration of redox species in solution.

Steady-State Model for CG-TC SECCM Responses

At steady-state, the rate carrier transport to the space charge layer within the semiconductor, heterogeneous charge transfer at the electrochemical interface, and mass transport of redox species in solution must be equal:

$$i = i_{ct} = i_k = i_{mt} \quad S23$$

Here,  $ct$ ,  $k$ , and  $mt$  refer to charge transport, kinetic, and mass transfer-limited currents. These will be assumed to have the expressions:

$$i = i_{ct} = q_e A m_{ct} [C^* - C] = i_{CT} \left(1 - \frac{C}{C^*}\right) \quad S24$$

$$i = i_k = q_e A k^0 C C_r = i_K \left(\frac{C C_r}{C^* C_r^*}\right) \quad S25$$

$$i = i_{mt} = q_e A m_r [C_r^* - C_r] = i_{MT} \left(1 - \frac{C_r}{C_r^*}\right) \quad S26$$

Here it is assumed that the carrier transport and mass transfer rates can be described by traditional expressions, being proportional to the difference between bulk and interfacial concentrations. For carrier transport, it is being assumed that the “bulk” concentration changes with pipet position. Combining these expressions and simplifying yields:

$$i^2 - (i_{CT} + i_{MT} + \beta)i + i_{CT}i_{MT} = 0 \quad S27$$

where a kinetic parameter,  $\beta$  has been defined as:

$$\beta = \frac{i_{mt}i_{ct}}{i_k} \quad S28$$

This equation has the solutions:

$$i = \frac{(i_{CT} + i_{MT} + \beta) \pm \sqrt{(i_{CT} + i_{MT} + \beta)^2 - 4i_{CT}i_{MT}}}{2} \quad S29$$

Note that if  $\beta \rightarrow 0$  (very fast kinetics):

$$i \approx \frac{i_{CT} + i_{MT} \pm \sqrt{(i_{CT} - i_{MT})^2}}{2} = \frac{i_{CT} + i_{MT} \pm (i_{CT} - i_{MT})}{2} = i_{CT} \text{ or } i_{MT} \quad S30$$

#### Estimation of $iR$ Drops in the SECCM Geometry

Consider again a conical pipet with terminal radius  $r_0$  and half-angle  $\theta_p$ . The potential profile within this pipet can be approximated as a solution to Poisson's equation for a spherical sector which approximates the pipet geometry:

$$\nabla^2 \varphi = 0 \quad S31$$

where it has been assumed that the charge density everywhere within the pipet volume is zero. Taking the potential of the terminal surface to be zero, and that at large distances to be  $\varphi_\infty$ , this has the following solution:

$$\varphi = \varphi_\infty \left[ 1 - \frac{r_s}{r} \right] \quad S32$$

where  $r_s$  is the radius of the sector as defined before. The current density at any point within the pipet can be found as:

$$j = -\sigma \frac{\partial \varphi}{\partial r} = -\frac{\sigma \varphi_\infty r_s}{r^2} \quad S33$$

The total current flowing in the pipet can be found by integrating this expression across a spherical surface within the pipet. This is most easily accomplished by multiplying by the area  $A = 2\pi[1 - \cos \theta_p]r^2$ :

$$i = jA = -2\pi[1 - \cos \theta_p]r_s \sigma \varphi_\infty \quad S34$$

Defining the pipet resistance as  $R = -\varphi_\infty/i$  and substituting for  $r_s$ , its value is found to be:

$$R = \frac{\tan \theta_p}{2\pi[1 - \cos \theta_p]r_0 \sigma} \quad S35$$

Taking the conductivity<sup>2</sup> of a 100 mM NaI solution to be 10.9 mS cm<sup>-1</sup> and assuming a typical pipet geometry of  $r_0 = 150$  nm and  $\theta_p = 10^\circ$ ,  $R \approx 10^7 \Omega$ . Thus, for the nA-level currents observed in the experiments here,  $iR$  drops are anticipated to be on the level of ~10 mV and largely inconsequential.

## Additional Experimental Data

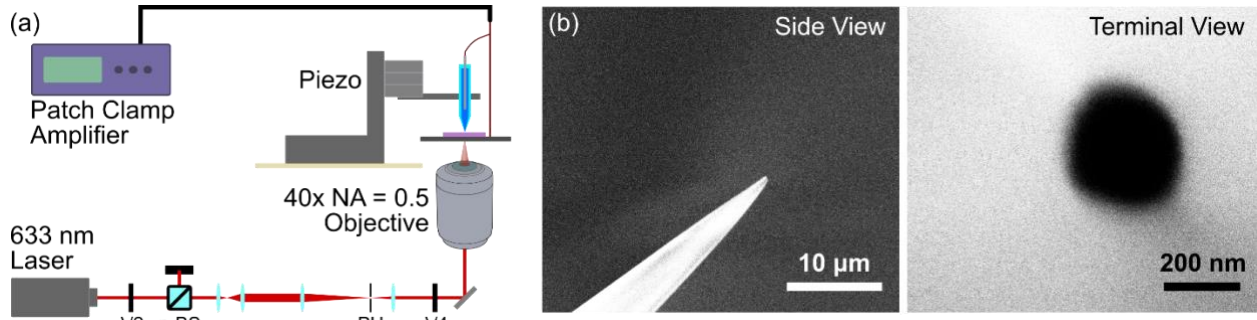

**Figure S1.** (a) Experimental configuration employed in CG-TC SECCM studies and (b) representative SEM images of a pipet probe employed for SECCM imaging. In (a),  $\lambda/2$  = half-wave plate,  $\lambda/4$  = quarter-wave plate, p-BS = polarizing beam-splitter, and PH = pinhole. Together, the half-wave plate and beamsplitter act as a continuously variable attenuator.

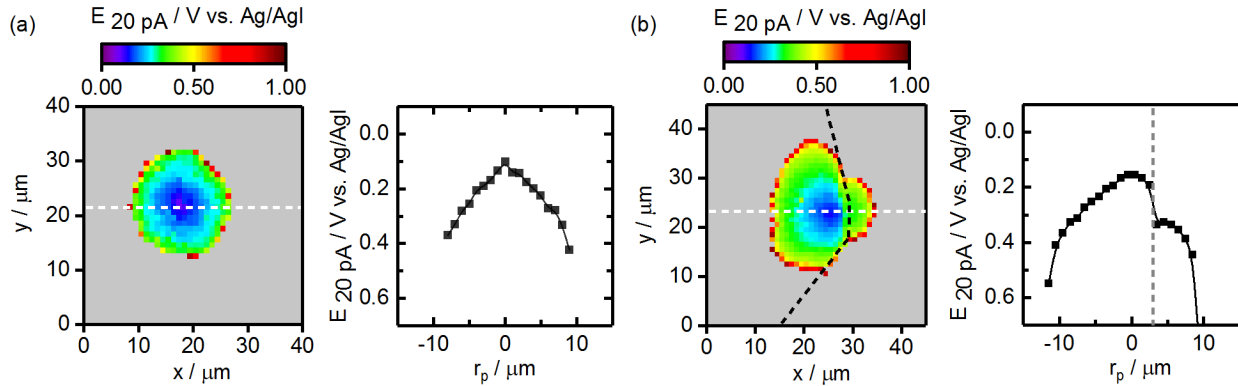

**Figure S2.** CG-TC SECCM photovoltage images acquired within an n-WSe<sub>2</sub> basal plane (a) and across an individual step-edge defect within an n-WSe<sub>2</sub> nanosheet. The images were constructed by calculating the potential necessary to achieve a photocurrent of 20 pA from the CG-TC SECCM data depicted in **Figures 2** and **4** in the main text.

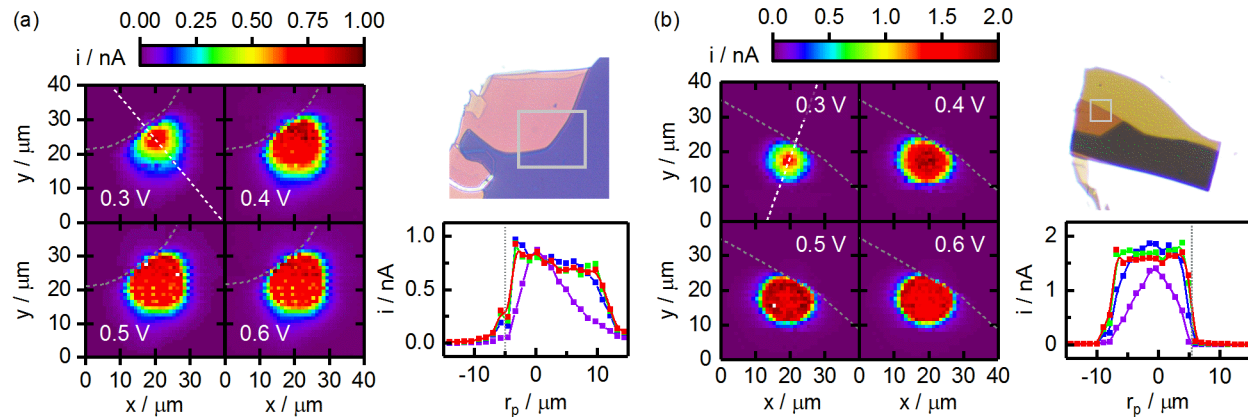

**Figure S3.** Additional examples of CG-TC SECCM experiments probing carrier transport across individual step-edge defects in n-WSe<sub>2</sub> nanosheets. All data were acquired using an aqueous solution containing 100 mM NaI and 10 mM I<sub>2</sub>. Potentials were swept from -1 V to 0.5 V at 2000 mV/s vs. Ag/AgI. Imaging was carried out in the vicinity of a 633 nm Gaussian beam with  $P_0 = 600$  nW and  $\sigma_0 = 0.73$   $\mu\text{m}$ .

## Details on Finite Element Simulations

### Theoretical Framework

The approximate treatment outlined above, which considers only 2D transport via diffusion within an infinite semiconducting layer, is only intended to provide qualitative insights into the CG-TC SECCM method. For quantitative insights, finite element simulations were carried out using COMSOL Multiphysics. These simulations were employed to find steady-state solutions to Poisson's equation (which dictates fields within the material) and the drift-diffusion equation (governing carrier transport):

$$\nabla \cdot (\epsilon \nabla \varphi) = \frac{q_e n_D}{\epsilon_0} \left[ 1 - e^{-\frac{q_e \varphi}{k_b T}} \right] \quad S36$$

$$\nabla \cdot \left( \mathbf{D} \nabla C + \frac{q \mathbf{D} \nabla \varphi}{k_b T} C \right) - \frac{C}{t_c} + \frac{\alpha P_0}{2\pi \sigma_0^2 h\nu} e^{-\frac{(x-x_g)^2 + (y-y_g)^2}{2\sigma_0^2}} e^{-\alpha z} = 0 \quad S37$$

In these equations,  $\epsilon$  is the dielectric constant (a tensor quantity due to the anisotropy of the 2D material),  $\varphi$  is the electric potential,  $n_D$  is the density of dopants within the semiconductor,  $\epsilon_0$  is the vacuum dielectric constant, and  $k_b T$  is Boltzmann's constant times temperature.  $\mathbf{D}$  is the diffusion coefficient (again a tensor),  $t_c$  is the carrier lifetime,  $\alpha$  is the absorption coefficient of the semiconductor,  $P_0$  is the power in the gaussian excitation beam,  $\sigma_0$  is the beam standard deviation,  $x_g/y_g$  denote the excitation centroid, and  $z$  denotes the vertical position within the sheet.

These equations were implemented within COMSOL using general PDE interfaces. Simulations of basal plane experiments employed a geometry consisting of an oblate cylinder with a diameter of 30  $\mu\text{m}$ . Step-edge simulations employed a similar geometry with a rectangular volume removed to approximate a step in the center of the geometry. The following boundary conditions were employed to find solutions to Poisson's equation:

$$\varphi(z = 0) = 0 \quad S38$$

$$\varphi \left( [x - x_p]^2 + [y - y_p]^2 < r_0^2, z = w \right) = E_{fb} - E \quad S39$$

Here,  $w$  is the nanosheet thickness at the point of pipet contact,  $r_0$  is the pipet radius,  $x_p/y_p$  denote the lateral pipet location, and  $E_{fb} - E$  represents the applied potential with respect to the flatband potential. In the step-edge simulations, an additional boundary condition was employed:

$$\left. \frac{\partial \varphi}{\partial x} \right|_{x=0, w_2 > z > w_1} = \frac{Q}{\epsilon_{xy} \epsilon_0} \quad S40$$

where  $Q$  is the surface charge density at the defect surface. For the drift-diffusion equations, boundary conditions were employed at the pipet and defect interfaces:

$$C \left( [x - x_p]^2 + [y - y_p]^2 < r_0^2, z = w \right) = 0 \quad S41$$

$$C(x = 0, w_2 > z > w_1) = 0 \quad S42$$



*Values of Physical Constants Employed in Finite Element Simulations*

**Table S1.** Values of physical constants employed in finite element simulations. Subscript  $z$ 's and  $xy$ 's denote out-of-plane and in-plane quantities, respectively. Values were selected to match well to experimental measurements or typical literature values.<sup>3-6</sup>

| Quantity        | Value                                    | Quantity | Value                              |
|-----------------|------------------------------------------|----------|------------------------------------|
| $\epsilon_z$    | 8                                        | $\alpha$ | $9 \times 10^4 \text{ cm}^{-1}$    |
| $\epsilon_{xy}$ | 16                                       | $n_D$    | $1 \times 10^{17} \text{ cm}^{-3}$ |
| $\epsilon_0$    | $8.854 \times 10^{-12} \text{ F m}^{-1}$ | $q$      | $1.6 \times 10^{-19} \text{ C}$    |
| $E - E_{fb}$    | 0.5 V                                    | $k_b T$  | 0.026 eV                           |

**References**

- (1) Smith, L. M.; Wake, D. R.; Wolfe, J. P.; Levi, D.; Klein, M. V.; Klem, J.; Henderson, T.; Morkoç, H. Picosecond Imaging of Photoexcited Carriers in Quantum Wells: Anomalous Lateral Confinement at High Densities. *Phys. Rev. B* **1988**, *38* (8), 5788–5791.
- (2) *CRC Handbook of Chemistry and Physics*, 89th ed.; Lide, D. R., Ed.; CRC Press, 2008.
- (3) Frindt, R. F. The Optical Properties of Single Crystals of WSe<sub>2</sub> and MoTe<sub>2</sub>. *J. Phys. Chem. Solids* **1963**, *24* (9), 1107–1108.
- (4) Yu, X.; Sivula, K. Photogenerated Charge Harvesting and Recombination in Photocathodes of Solvent-Exfoliated WSe<sub>2</sub>. *Chem. Mater.* **2017**, *29* (16), 6863–6875.
- (5) Jakubowicz, A.; Mahalu, D.; Wolf, M.; Wold, A.; Tenne, R. WSe<sub>2</sub>: Optical and Electrical Properties as Related to Surface Passivation of Recombination Centers. *Phys. Rev. B* **1989**, *40* (5), 2992–3000.
- (6) Laturia, A.; Van de Put, M. L.; Vandenberghe, W. G. Dielectric Properties of Hexagonal Boron Nitride and Transition Metal Dichalcogenides: From Monolayer to Bulk. *npj 2D Mater. Appl.* **2018**, *2* (1), 6.

## COMSOL Model Report

### 1 Global Definitions

|      |                        |
|------|------------------------|
| Date | Dec 6, 2020 4:42:10 PM |
|------|------------------------|

#### GLOBAL SETTINGS

|                |                             |
|----------------|-----------------------------|
| Name           | Step Diffusion Model SI.mph |
| COMSOL version | COMSOL 5.3 (Build: 223)     |

#### USED PRODUCTS

|                     |
|---------------------|
| COMSOL Multiphysics |
|---------------------|

### 1.1 PARAMETERS 1

#### PARAMETERS

| Name  | Expression     | Value                       | Description |
|-------|----------------|-----------------------------|-------------|
| rp    | 126[nm]        | 1.26E-7 m                   |             |
| w     | 30[nm]         | 3E-8 m                      |             |
| ws    | 64[nm]         | 6.4E-8 m                    |             |
| nD    | 1e17[1/cm^3]   | 1E23 1/m <sup>3</sup>       |             |
| kbT   | 0.0257[eV]     | 4.1176E-21 J                |             |
| rs    | 30[um]         | 3E-5 m                      |             |
| epxy  | 16             | 16                          |             |
| epz   | 8              | 8                           |             |
| dPhi  | 0.5[V]         | 0.5 V                       |             |
| Lxy   | 2.8[um]        | 2.8E-6 m                    |             |
| RL    | 480            | 480                         |             |
| Lz    | Lxy/RL         | 5.8333E-9 m                 |             |
| tau   | 1[ns]          | 1E-9 s                      |             |
| Dxy   | Lxy^2/tau      | 0.00784 m <sup>2</sup> /s   |             |
| Dz    | Lz^2/tau       | 3.4028E-8 m <sup>2</sup> /s |             |
| S     | 0.725[um]      | 7.25E-7 m                   |             |
| P0    | 600[nW]        | 6E-7 W                      |             |
| wl    | 633[nm]        | 6.33E-7 m                   |             |
| Ep    | 1240[nm*eV]/wl | 3.1385E-19 J                |             |
| N0    | P0/Ep          | 1.9117E12 1/s               |             |
| alpha | 9e4[1/cm]      | 9E6 1/m                     |             |
| xp    | 5[um]          | 5E-6 m                      |             |
| h0    | 1[nm]          | 1E-9 m                      |             |

| Name | Expression                                                                       | Value                 | Description |
|------|----------------------------------------------------------------------------------|-----------------------|-------------|
| beta | 0.1                                                                              | 0.1                   |             |
| Nh   | $\text{ceil}(1/\text{beta} \cdot \log(1 + w/h0 \cdot (\exp(\text{beta}) - 1)))$  | 15                    |             |
| xg   | -3.5[um]                                                                         | -3.5E-6 m             |             |
| Qs   | 1e-6[C/cm^2]                                                                     | 0.01 C/m <sup>2</sup> |             |
| Nhs  | $\text{ceil}(1/\text{beta} \cdot \log(1 + ws/h0 \cdot (\exp(\text{beta}) - 1)))$ | 21                    |             |
| Ny   | 40                                                                               | 40                    |             |
| Nyr  | 40                                                                               | 40                    |             |

## 2 Component 1

### COMPONENT SETTINGS

|             |    |
|-------------|----|
| Unit system | SI |
|-------------|----|

### 2.1 DEFINITIONS

#### 2.1.1 Variables

##### *Variables 1*

### SELECTION

|                        |              |
|------------------------|--------------|
| Geometric entity level | Entire model |
|------------------------|--------------|

| Name | Expression                                                                                                                      | Unit                | Description |
|------|---------------------------------------------------------------------------------------------------------------------------------|---------------------|-------------|
| Rg   | $N0 \cdot \alpha \cdot \exp(-\alpha \cdot z) / (2 \cdot \pi \cdot S^2) \cdot \exp(-1 \cdot ((x - xg)^2 + y^2) / (2 \cdot S^2))$ | $1 / (m^3 \cdot s)$ |             |

#### 2.1.2 Coordinate Systems

##### *Boundary System 1*

|                        |                 |
|------------------------|-----------------|
| Coordinate system type | Boundary system |
| Tag                    | sys1            |

### COORDINATE NAMES

| First | Second | Third |
|-------|--------|-------|
| t1    | t2     | n     |

### 2.2 GEOMETRY 1

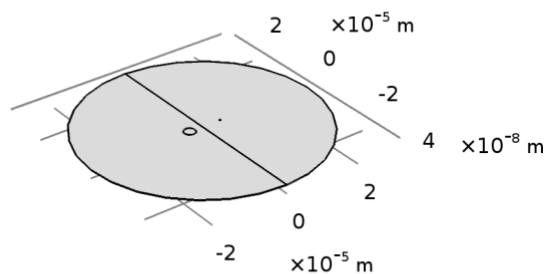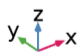

Geometry 1

## UNITS

|              |     |
|--------------|-----|
| Length unit  | m   |
| Angular unit | deg |

## GEOMETRY STATISTICS

| Description          | Value |
|----------------------|-------|
| Space dimension      | 3     |
| Number of domains    | 11    |
| Number of boundaries | 57    |
| Number of edges      | 97    |
| Number of vertices   | 54    |

### 2.2.1 Work Plane 1 (wp1)

#### UNITE OBJECTS

| Description   | Value |
|---------------|-------|
| Unite objects | On    |

#### *Plane Geometry (sequence2D)*

#### Rectangle 1 (r1)

##### POSITION

| Description | Value     |
|-------------|-----------|
| Position    | {-w, -rs} |

##### SIZE

| Description | Value |
|-------------|-------|
| Width       | w     |
| Height      | 2*rs  |

#### Rectangle 2 (r2)

##### POSITION

| Description | Value    |
|-------------|----------|
| Position    | {0, -rs} |

##### SIZE

| Description | Value |
|-------------|-------|
| Width       | w     |
| Height      | 2*rs  |

Circle 1 (c1)

POSITION

| Description | Value       |
|-------------|-------------|
| Position    | $\{-w, 0\}$ |

ROTATION ANGLE

| Description | Value |
|-------------|-------|
| Rotation    | 90    |

SIZE AND SHAPE

| Description  | Value |
|--------------|-------|
| Radius       | rs    |
| Sector angle | 180   |

Circle 2 (c2)

POSITION

| Description | Value      |
|-------------|------------|
| Position    | $\{w, 0\}$ |

ROTATION ANGLE

| Description | Value |
|-------------|-------|
| Rotation    | 270   |

SIZE AND SHAPE

| Description  | Value |
|--------------|-------|
| Radius       | rs    |
| Sector angle | 180   |

Circle 3 (c3)

POSITION

| Description | Value       |
|-------------|-------------|
| Position    | $\{xp, 0\}$ |

SIZE AND SHAPE

| Description | Value |
|-------------|-------|
| Radius      | rp    |

Circle 4 (c4)

POSITION

| Description | Value   |
|-------------|---------|
| Position    | {xg, 0} |

#### SIZE AND SHAPE

| Description | Value |
|-------------|-------|
| Radius      | 2*S   |

#### Circle 5 (c5)

##### POSITION

| Description | Value   |
|-------------|---------|
| Position    | {xp, 0} |

##### SIZE AND SHAPE

| Description  | Value  |
|--------------|--------|
| Radius       | rp + w |
| Sector angle | 180    |

#### Circle 6 (c6)

##### POSITION

| Description | Value   |
|-------------|---------|
| Position    | {xp, 0} |

##### ROTATION ANGLE

| Description | Value |
|-------------|-------|
| Rotation    | 180   |

##### SIZE AND SHAPE

| Description  | Value  |
|--------------|--------|
| Radius       | rp + w |
| Sector angle | 180    |

#### 2.2.2 Extrude 1 (ext1)

##### SETTINGS

| Description | Value        |
|-------------|--------------|
| Work plane  | Work Plane 1 |

##### DISTANCES

| Distances (m) |
|---------------|
| w             |

## SCALES

| Scales xw | Scales yw |
|-----------|-----------|
| 1         | 1         |

## DISPLACEMENTS

| Displacements xw (m) | Displacements yw (m) |
|----------------------|----------------------|
| 0                    | 0                    |

## TWIST ANGLES

| Twist angles (deg) |
|--------------------|
| 0                  |

### 2.2.3 Work Plane 2 (wp2)

## UNITE OBJECTS

| Description   | Value |
|---------------|-------|
| Unite objects | On    |

### *Plane Geometry (sequence2D)*

#### Rectangle 1 (r1)

## POSITION

| Description | Value     |
|-------------|-----------|
| Position    | {-w, -rs} |

## SIZE

| Description | Value |
|-------------|-------|
| Width       | w     |
| Height      | 2*rs  |

#### Circle 1 (c1)

## POSITION

| Description | Value   |
|-------------|---------|
| Position    | {-w, 0} |

## ROTATION ANGLE

| Description | Value |
|-------------|-------|
| Rotation    | 90    |

## SIZE AND SHAPE



| Description  | Value |
|--------------|-------|
| Radius       | rs    |
| Sector angle | 180   |

#### Circle 4 (c4)

##### POSITION

| Description | Value   |
|-------------|---------|
| Position    | {xg, 0} |

##### SIZE AND SHAPE

| Description | Value |
|-------------|-------|
| Radius      | 2*S   |

#### 2.2.4 Extrude 2 (ext2)

##### SETTINGS

| Description | Value        |
|-------------|--------------|
| Work plane  | Work Plane 2 |

##### DISTANCES

| Distances (m) |
|---------------|
| ws            |

##### SCALES

| Scales xw | Scales yw |
|-----------|-----------|
| 1         | 1         |

##### DISPLACEMENTS

| Displacements xw (m) | Displacements yw (m) |
|----------------------|----------------------|
| 0                    | 0                    |

##### TWIST ANGLES

| Twist angles (deg) |
|--------------------|
| 0                  |

#### 2.3 POISSON-BOLTZMANN

##### USED PRODUCTS

|                     |
|---------------------|
| COMSOL Multiphysics |
|---------------------|

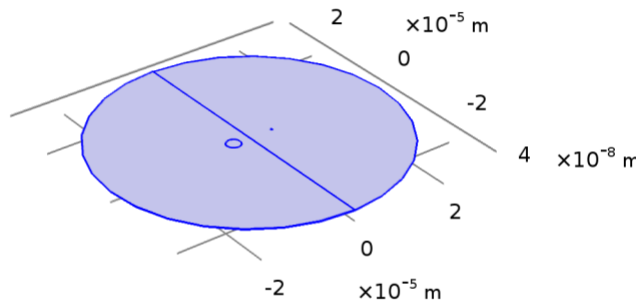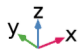

*Poisson-Boltzmann*

#### SELECTION

|                        |              |
|------------------------|--------------|
| Geometric entity level | Domain       |
| Selection              | Domains 1–11 |

#### SETTINGS

| Description                                          | Value                  |
|------------------------------------------------------|------------------------|
| Shape function type                                  | Lagrange               |
| Element order                                        | Quadratic              |
| Compute boundary fluxes                              | On                     |
| Apply smoothing to boundary fluxes                   | On                     |
| Value type when using splitting of complex variables | Complex                |
| Frame                                                | Spatial                |
| Dependent variable quantity                          | Electric potential (V) |
| Source term quantity                                 | None                   |
| Unit                                                 | C/m <sup>3</sup>       |

#### VARIABLES

| Name     | Expression  | Unit | Description                       | Selection       |
|----------|-------------|------|-----------------------------------|-----------------|
| p.nx     | nx          |      | Normal vector, x component        | Boundaries 1–57 |
| p.ny     | ny          |      | Normal vector, y component        | Boundaries 1–57 |
| p.nz     | nz          |      | Normal vector, z component        | Boundaries 1–57 |
| p.nxmesh | root.nxmesh |      | Normal vector (mesh), x component | Boundaries 1–57 |

| Name     | Expression  | Unit | Description                       | Selection       |
|----------|-------------|------|-----------------------------------|-----------------|
| p.nymesh | root.nymesh |      | Normal vector (mesh), y component | Boundaries 1–57 |
| p.nzmesh | root.nzmesh |      | Normal vector (mesh), z component | Boundaries 1–57 |

### 2.3.1 Coefficient Form PDE 1

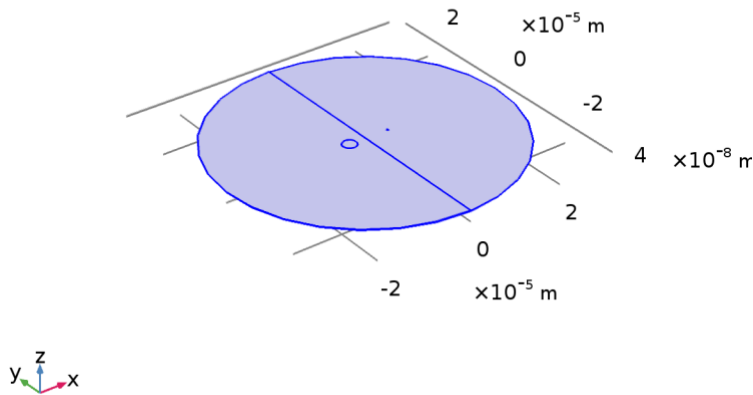

#### Coefficient Form PDE 1

##### SELECTION

|                        |              |
|------------------------|--------------|
| Geometric entity level | Domain       |
| Selection              | Domains 1–11 |

##### EQUATIONS

$$e_a \frac{\partial^2 \phi}{\partial t^2} + d_a \frac{\partial \phi}{\partial t} + \nabla \cdot (-c \nabla \phi - \alpha \phi + \gamma) + \beta \cdot \nabla \phi + a \phi = f$$

$$\nabla = \left[ \frac{\partial}{\partial x}, \frac{\partial}{\partial y}, \frac{\partial}{\partial z} \right]$$

##### SETTINGS

| Description                 | Value                                                                                  |
|-----------------------------|----------------------------------------------------------------------------------------|
| Diffusion coefficient       | {{epxy*epsilon0_const, 0, 0}, {0, epxy*epsilon0_const, 0}, {0, 0, epz*epsilon0_const}} |
| Absorption coefficient      | 0                                                                                      |
| Source term                 | e_const*nD*(1 - exp(e_const*phi/kbT))                                                  |
| Mass coefficient            | 0                                                                                      |
| Damping or mass coefficient | 0                                                                                      |

| Description                              | Value     |
|------------------------------------------|-----------|
| Conservative flux convection coefficient | {0, 0, 0} |
| Convection coefficient                   | {0, 0, 0} |
| Conservative flux source                 | {0, 0, 0} |

### Variables

| Name         | Expression                       | Unit             | Description              | Selection    |
|--------------|----------------------------------|------------------|--------------------------|--------------|
| domflux.phix | $-epxy*\epsilon_{0\_const}*phix$ | C/m <sup>2</sup> | Domain flux, x component | Domains 1–11 |
| domflux.phiy | $-epxy*\epsilon_{0\_const}*phiy$ | C/m <sup>2</sup> | Domain flux, y component | Domains 1–11 |
| domflux.phiz | $-epz*\epsilon_{0\_const}*phiz$  | C/m <sup>2</sup> | Domain flux, z component | Domains 1–11 |

### Shape functions

| Name | Shape function       | Unit | Description            | Shape frame | Selection    |
|------|----------------------|------|------------------------|-------------|--------------|
| phi  | Lagrange (Quadratic) | V    | Dependent variable phi | Spatial     | Domains 1–11 |

### 2.3.2 Zero Flux 1

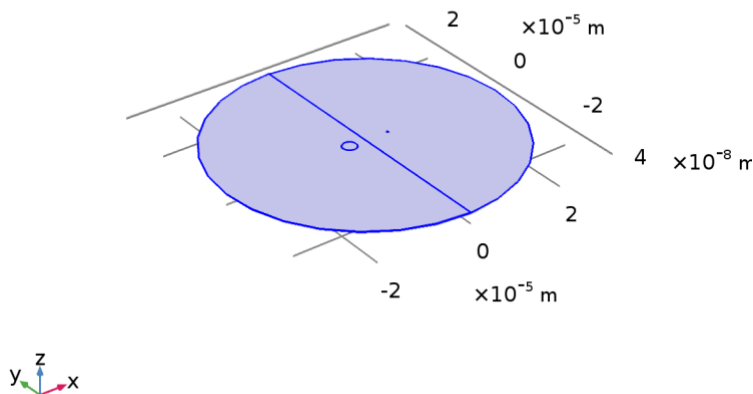

### Zero Flux 1

#### SELECTION

|                        |                                                                                 |
|------------------------|---------------------------------------------------------------------------------|
| Geometric entity level | Boundary                                                                        |
| Selection              | Boundaries 1–2, 4–5, 7, 10, 14, 20, 23, 25, 28–29, 31, 34–35, 37, 39, 41, 47–48 |

EQUATIONS

$$-\mathbf{n} \cdot (-c \nabla \phi - \alpha \phi + \gamma) = 0$$

$$\nabla = \left[ \frac{\partial}{\partial x}, \frac{\partial}{\partial y}, \frac{\partial}{\partial z} \right]$$

2.3.3 Initial Values 1

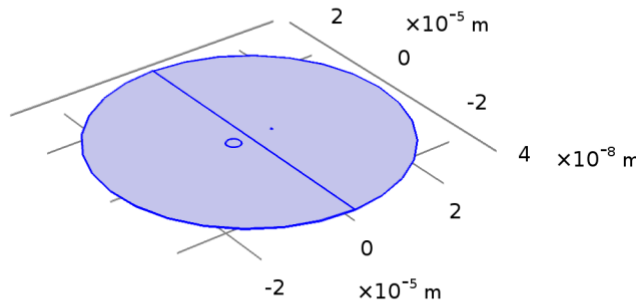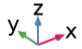

Initial Values 1

SELECTION

|                        |              |
|------------------------|--------------|
| Geometric entity level | Domain       |
| Selection              | Domains 1–11 |

SETTINGS

| Description                    | Value |
|--------------------------------|-------|
| Initial value for phi          | 0     |
| Initial time derivative of phi | 0     |

### 2.3.4 Dirichlet Boundary Condition 1

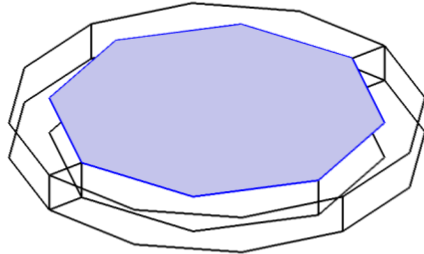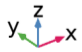

*Dirichlet Boundary Condition 1*

#### SELECTION

|                        |             |
|------------------------|-------------|
| Geometric entity level | Boundary    |
| Selection              | Boundary 52 |

#### EQUATIONS

$$\phi = r$$

$$g_{\text{reaction}} = -\mu$$

#### SETTINGS

| Description             | Value                          |
|-------------------------|--------------------------------|
| Value on boundary       | -dPhi                          |
| Prescribed value of phi | On                             |
| Apply reaction terms on | Individual dependent variables |
| Use weak constraints    | Off                            |
| Constraint method       | Elemental                      |

#### Shape functions

| Constraint | Constraint force | Shape function       | Selection   |
|------------|------------------|----------------------|-------------|
| -dPhi-phi  | -test(phi)       | Lagrange (Quadratic) | Boundary 52 |

### 2.3.5 Dirichlet Boundary Condition 2

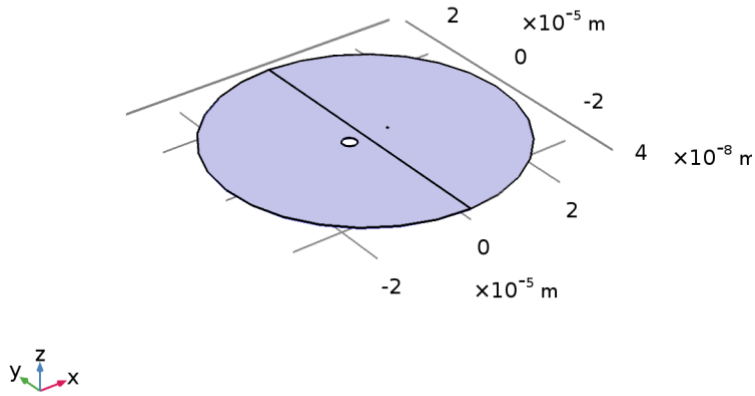

#### Dirichlet Boundary Condition 2

##### SELECTION

|                        |                                     |
|------------------------|-------------------------------------|
| Geometric entity level | Boundary                            |
| Selection              | Boundaries 3, 21, 32, 38, 45–46, 51 |

##### EQUATIONS

$$\phi = r$$

$$g_{\text{reaction}} = -\mu$$

##### SETTINGS

| Description             | Value                          |
|-------------------------|--------------------------------|
| Value on boundary       | 0                              |
| Prescribed value of phi | On                             |
| Apply reaction terms on | Individual dependent variables |
| Use weak constraints    | Off                            |
| Constraint method       | Elemental                      |

##### Shape functions

| Constraint | Constraint force | Shape function       | Selection                           |
|------------|------------------|----------------------|-------------------------------------|
| -phi       | -test(phi)       | Lagrange (Quadratic) | Boundaries 3, 21, 32, 38, 45–46, 51 |

### 2.3.6 Flux/Source 1

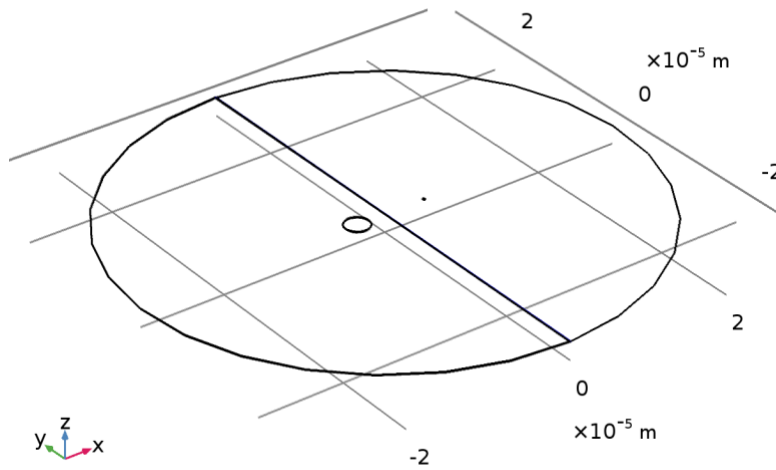

Flux/Source 1

#### SELECTION

|                        |             |
|------------------------|-------------|
| Geometric entity level | Boundary    |
| Selection              | Boundary 33 |

#### EQUATIONS

$$-\mathbf{n} \cdot (-c\nabla\phi - \alpha\phi + \gamma) = g - q\phi$$

$$\nabla = \left[ \frac{\partial}{\partial x}, \frac{\partial}{\partial y}, \frac{\partial}{\partial z} \right]$$

#### SETTINGS

| Description                        | Value |
|------------------------------------|-------|
| Boundary flux/source               | Qs    |
| Boundary absorption/impedance term | 0     |

#### Variables

| Name    | Expression | Unit             | Description          | Selection   |
|---------|------------|------------------|----------------------|-------------|
| p.g_phi | Qs         | C/m <sup>2</sup> | Boundary flux/source | Boundary 33 |

## 2.4 DRIFT-DIFFUSION

#### USED PRODUCTS

|                     |
|---------------------|
| COMSOL Multiphysics |
|---------------------|





### Drift-Diffusion

#### SELECTION

|                        |              |
|------------------------|--------------|
| Geometric entity level | Domain       |
| Selection              | Domains 1–11 |

#### SETTINGS

| Description                                          | Value                              |
|------------------------------------------------------|------------------------------------|
| Shape function type                                  | Lagrange                           |
| Element order                                        | Quadratic                          |
| Compute boundary fluxes                              | On                                 |
| Apply smoothing to boundary fluxes                   | On                                 |
| Value type when using splitting of complex variables | Complex                            |
| Frame                                                | Spatial                            |
| Dependent variable quantity                          | Number density (1/m <sup>3</sup> ) |
| Source term quantity                                 | None                               |
| Unit                                                 | m <sup>-3</sup> s <sup>-1</sup>    |

#### VARIABLES

| Name     | Expression  | Unit | Description                       | Selection       |
|----------|-------------|------|-----------------------------------|-----------------|
| C.nx     | nx          |      | Normal vector, x component        | Boundaries 1–57 |
| C.ny     | ny          |      | Normal vector, y component        | Boundaries 1–57 |
| C.nz     | nz          |      | Normal vector, z component        | Boundaries 1–57 |
| C.nxmesh | root.nxmesh |      | Normal vector (mesh), x component | Boundaries 1–57 |

| Name     | Expression  | Unit | Description                       | Selection       |
|----------|-------------|------|-----------------------------------|-----------------|
| C.nymesh | root.nymesh |      | Normal vector (mesh), y component | Boundaries 1–57 |
| C.nzmesh | root.nzmesh |      | Normal vector (mesh), z component | Boundaries 1–57 |

### 2.4.1 Coefficient Form PDE 1

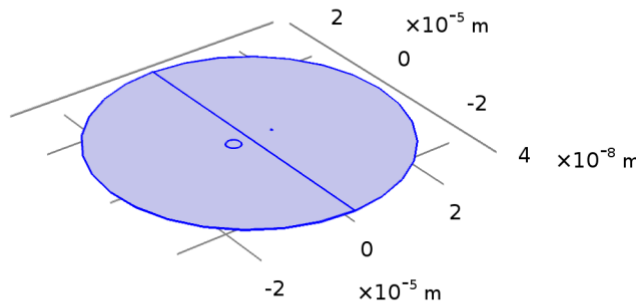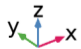

#### Coefficient Form PDE 1

##### SELECTION

|                        |              |
|------------------------|--------------|
| Geometric entity level | Domain       |
| Selection              | Domains 1–11 |

##### EQUATIONS

$$e_a \frac{\partial^2 c_h}{\partial t^2} + d_a \frac{\partial c_h}{\partial t} + \nabla \cdot (-c \nabla c_h - \alpha c_h + \gamma) + \beta \cdot \nabla c_h + a c_h = f$$

$$\nabla = \left[ \frac{\partial}{\partial x}, \frac{\partial}{\partial y}, \frac{\partial}{\partial z} \right]$$

##### SETTINGS

| Description                 | Value                                  |
|-----------------------------|----------------------------------------|
| Diffusion coefficient       | {{Dxy, 0, 0}, {0, Dxy, 0}, {0, 0, Dz}} |
| Absorption coefficient      | 1/tau                                  |
| Source term                 | Rg                                     |
| Mass coefficient            | 0                                      |
| Damping or mass coefficient | 1                                      |

| Description                              | Value                                                                                                                                    |
|------------------------------------------|------------------------------------------------------------------------------------------------------------------------------------------|
| Conservative flux convection coefficient | $\{e\_const \cdot D_{xy} \cdot \text{phix}/kbT, e\_const \cdot D_{xy} \cdot \text{phiy}/kbT, e\_const \cdot D_z \cdot \text{phiz}/kbT\}$ |
| Convection coefficient                   | $\{0, 0, 0\}$                                                                                                                            |
| Conservative flux source                 | $\{0, 0, 0\}$                                                                                                                            |

### Variables

| Name        | Expression                                                       | Unit              | Description              | Selection    |
|-------------|------------------------------------------------------------------|-------------------|--------------------------|--------------|
| domflux.Chx | $D_{xy} \cdot (-Ch_x - e\_const \cdot \text{phix} \cdot Ch/kbT)$ | $1/(m^2 \cdot s)$ | Domain flux, x component | Domains 1–11 |
| domflux.Chy | $D_{xy} \cdot (-Ch_y - e\_const \cdot \text{phiy} \cdot Ch/kbT)$ | $1/(m^2 \cdot s)$ | Domain flux, y component | Domains 1–11 |
| domflux.Chz | $D_z \cdot (-Ch_z - e\_const \cdot \text{phiz} \cdot Ch/kbT)$    | $1/(m^2 \cdot s)$ | Domain flux, z component | Domains 1–11 |

### Shape functions

| Name | Shape function       | Unit    | Description           | Shape frame | Selection    |
|------|----------------------|---------|-----------------------|-------------|--------------|
| Ch   | Lagrange (Quadratic) | $1/m^3$ | Dependent variable Ch | Spatial     | Domains 1–11 |

#### 2.4.2 Zero Flux 1

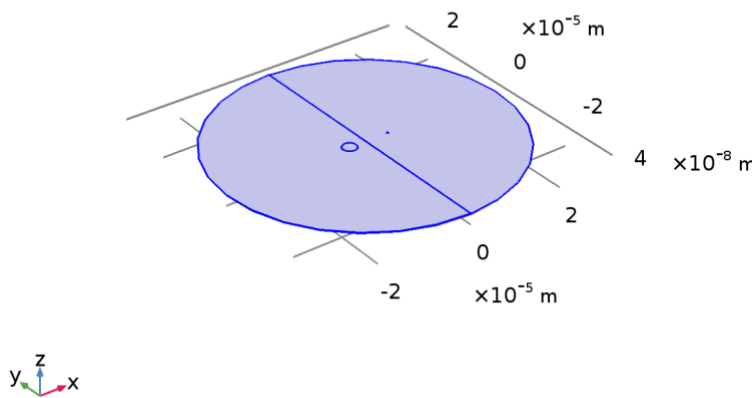

#### Zero Flux 1

##### SELECTION

|                        |                                                                                     |
|------------------------|-------------------------------------------------------------------------------------|
| Geometric entity level | Boundary                                                                            |
| Selection              | Boundaries 1–5, 7, 10, 14, 20–21, 23, 25, 28–29, 31–32, 34–35, 37–39, 41, 45–48, 51 |

EQUATIONS

$$-\mathbf{n} \cdot (-c\nabla Ch - \alpha Ch + \gamma) = 0$$

$$\nabla = \left[ \frac{\partial}{\partial x}, \frac{\partial}{\partial y}, \frac{\partial}{\partial z} \right]$$

2.4.3 Initial Values 1

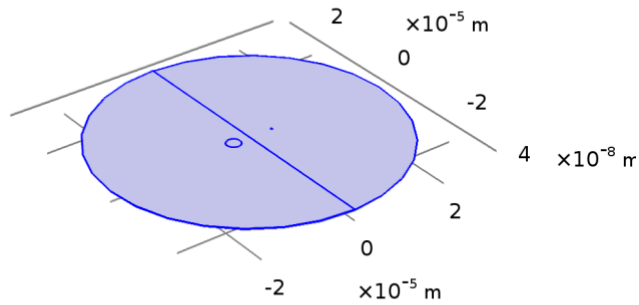

Initial Values 1

SELECTION

|                        |              |
|------------------------|--------------|
| Geometric entity level | Domain       |
| Selection              | Domains 1–11 |

SETTINGS

| Description                   | Value  |
|-------------------------------|--------|
| Initial value for Ch          | Rg*tau |
| Initial time derivative of Ch | 0      |

## 2.4.4 Dirichlet Boundary Condition 1

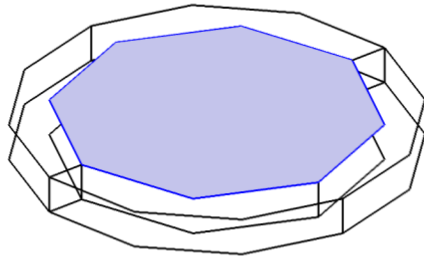

*Dirichlet Boundary Condition 1*

### SELECTION

|                        |             |
|------------------------|-------------|
| Geometric entity level | Boundary    |
| Selection              | Boundary 52 |

### EQUATIONS

$$Ch = r$$

$$g_{\text{reaction}} = -\mu$$

### SETTINGS

| Description             | Value                          |
|-------------------------|--------------------------------|
| Value on boundary       | 0                              |
| Prescribed value of Ch  | On                             |
| Apply reaction terms on | Individual dependent variables |
| Use weak constraints    | Off                            |
| Constraint method       | Elemental                      |

### Shape functions

| Constraint | Constraint force | Shape function       | Selection   |
|------------|------------------|----------------------|-------------|
| -Ch        | -test(Ch)        | Lagrange (Quadratic) | Boundary 52 |

## 2.4.5 Dirichlet Boundary Condition 2



### Dirichlet Boundary Condition 2

#### SELECTION

|                        |             |
|------------------------|-------------|
| Geometric entity level | Boundary    |
| Selection              | Boundary 33 |

#### EQUATIONS

$$Ch = r$$

$$g_{\text{reaction}} = -\mu$$

#### SETTINGS

| Description             | Value                          |
|-------------------------|--------------------------------|
| Value on boundary       | 0                              |
| Prescribed value of Ch  | On                             |
| Apply reaction terms on | Individual dependent variables |
| Use weak constraints    | Off                            |
| Constraint method       | Elemental                      |

#### Shape functions

| Constraint | Constraint force | Shape function       | Selection   |
|------------|------------------|----------------------|-------------|
| -Ch        | -test(Ch)        | Lagrange (Quadratic) | Boundary 33 |

## 2.5 MESH 1

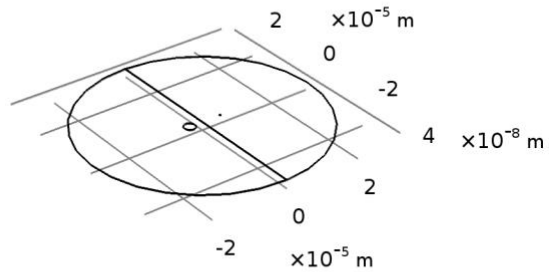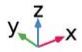

*Mesh 1*

### 2.5.1 Size (size)

#### SETTINGS

| Description                  | Value   |
|------------------------------|---------|
| Maximum element size         | 6.01E-6 |
| Minimum element size         | 1.08E-6 |
| Curvature factor             | 0.6     |
| Resolution of narrow regions | 0.5     |
| Maximum element growth rate  | 1.5     |

### 2.5.2 Size 1 (size1)

#### SELECTION

|                        |                |
|------------------------|----------------|
| Geometric entity level | Domain         |
| Selection              | Geometry geom1 |

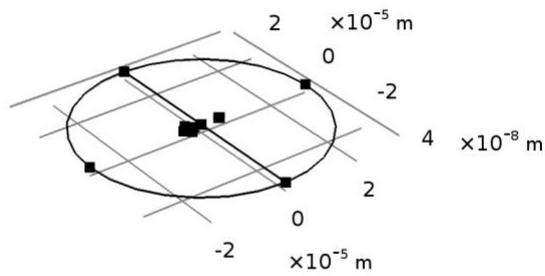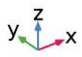

Size 1

#### SETTINGS

| Description                  | Value   |
|------------------------------|---------|
| Maximum element size         | 6.01E-6 |
| Minimum element size         | 1.08E-6 |
| Curvature factor             | 0.6     |
| Resolution of narrow regions | 0.5     |
| Maximum element growth rate  | 1.5     |

#### 2.5.3 Mapped 1 (map1)

##### SELECTION

|                        |                  |
|------------------------|------------------|
| Geometric entity level | Boundary         |
| Selection              | Boundaries 47–48 |



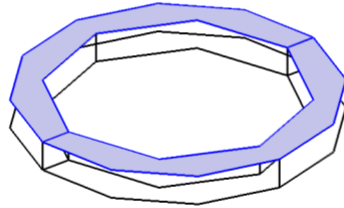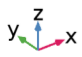

Mapped 1

Distribution 1 (dis1)

SELECTION

|                        |                     |
|------------------------|---------------------|
| Geometric entity level | Edge                |
| Selection              | Edges 79–80, 86, 89 |

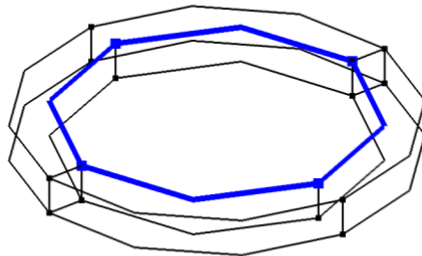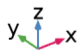

Distribution 1

SETTINGS

| Description        | Value |
|--------------------|-------|
| Number of elements | 3     |

Distribution 2 (dis2)

SELECTION

|                        |         |
|------------------------|---------|
| Geometric entity level | Edge    |
| Selection              | Edge 73 |

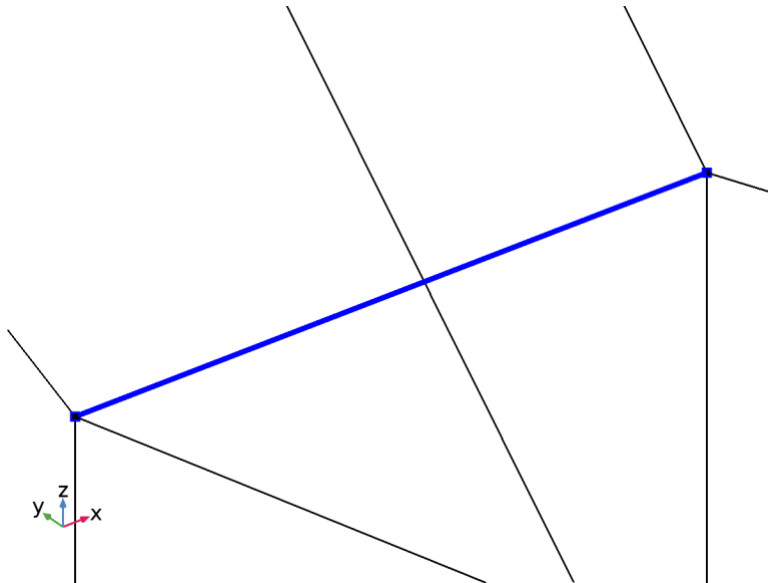

Distribution 2

SETTINGS

| Description                   | Value                                                                                                                                                                                                                                                                                              |
|-------------------------------|----------------------------------------------------------------------------------------------------------------------------------------------------------------------------------------------------------------------------------------------------------------------------------------------------|
| Distribution properties       | Explicit distribution                                                                                                                                                                                                                                                                              |
| Explicit element distribution | {0, 0.0333333333333333, 0.07017236393585487, 0.11088578920786052, 0.15588108279372723, 0.20560857271510286, 0.2605659484051071, 0.3213032417514574, 0.3884283320004732, 0.4626130296168887, 0.5445997999887868, 0.6352091942707551, 0.7353480617356363, 0.8460186258268543, 0.9683285147474958, 1} |

Distribution 3 (dis3)

SELECTION

|                        |         |
|------------------------|---------|
| Geometric entity level | Edge    |
| Selection              | Edge 95 |

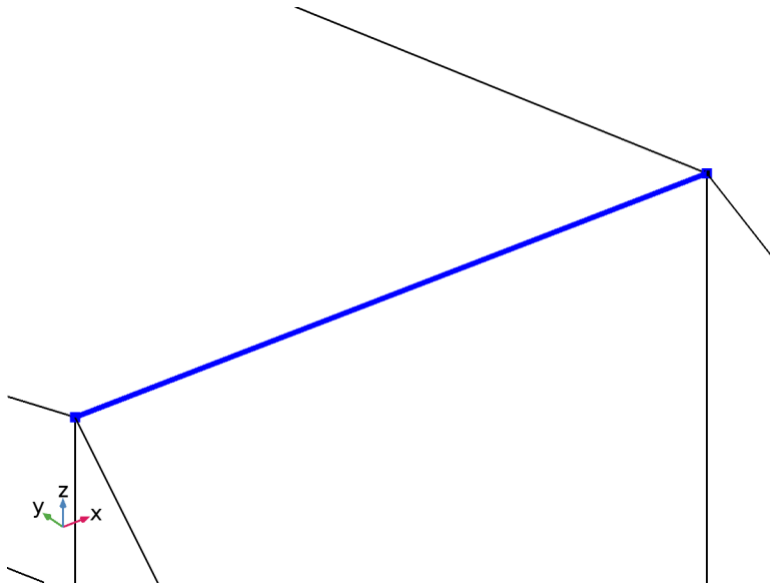

Distribution 3

SETTINGS

| Description                   | Value                                                                                                                                                                                                                                                                                               |
|-------------------------------|-----------------------------------------------------------------------------------------------------------------------------------------------------------------------------------------------------------------------------------------------------------------------------------------------------|
| Distribution properties       | Explicit distribution                                                                                                                                                                                                                                                                               |
| Explicit element distribution | {0, 0.03333333333333333, 0.07017236393585487, 0.11088578920786052, 0.15588108279372723, 0.20560857271510286, 0.2605659484051071, 0.3213032417514574, 0.3884283320004732, 0.4626130296168887, 0.5445997999887868, 0.6352091942707551, 0.7353480617356363, 0.8460186258268543, 0.9683285147474958, 1} |

2.5.4 Mapped 2 (map2)

SELECTION

|                        |             |
|------------------------|-------------|
| Geometric entity level | Boundary    |
| Selection              | Boundary 34 |

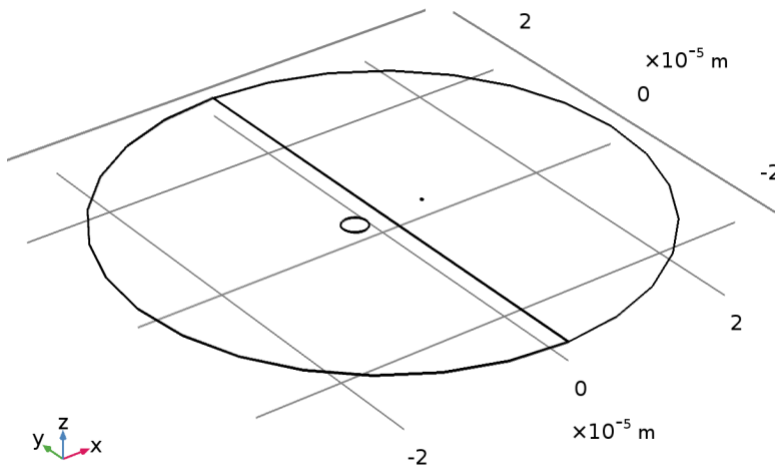

Mapped 2

Distribution 2 (dis2)

SELECTION

|                        |         |
|------------------------|---------|
| Geometric entity level | Edge    |
| Selection              | Edge 52 |

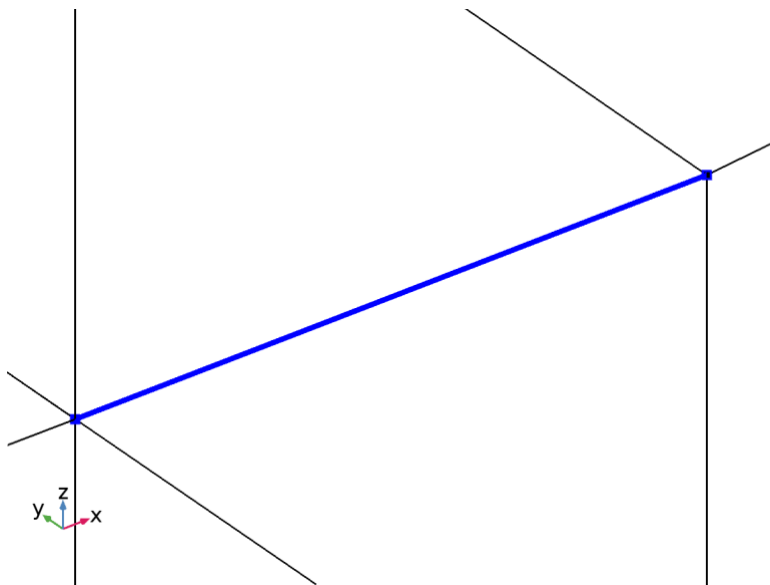

Distribution 2

SETTINGS

| Description             | Value                 |
|-------------------------|-----------------------|
| Distribution properties | Explicit distribution |

| Description                   | Value                                                                                                                                                                                                                                                                                               |
|-------------------------------|-----------------------------------------------------------------------------------------------------------------------------------------------------------------------------------------------------------------------------------------------------------------------------------------------------|
| Explicit element distribution | {0, 0.03333333333333333, 0.07017236393585487, 0.11088578920786052, 0.15588108279372723, 0.20560857271510286, 0.2605659484051071, 0.3213032417514574, 0.3884283320004732, 0.4626130296168887, 0.5445997999887868, 0.6352091942707551, 0.7353480617356363, 0.8460186258268543, 0.9683285147474958, 1} |
| Reverse direction             | On                                                                                                                                                                                                                                                                                                  |

*Distribution 3 (dis3)*

SELECTION

|                        |         |
|------------------------|---------|
| Geometric entity level | Edge    |
| Selection              | Edge 61 |

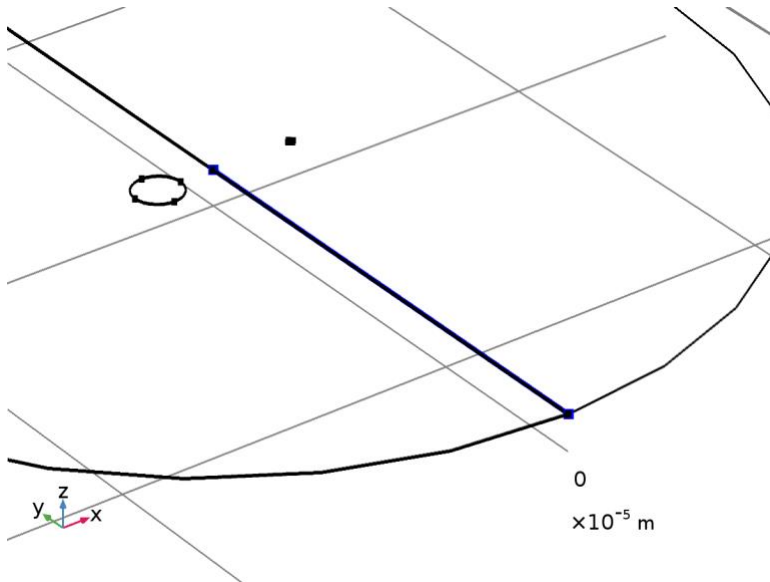

*Distribution 3*

SETTINGS

| Description             | Value                        |
|-------------------------|------------------------------|
| Distribution properties | Predefined distribution type |
| Number of elements      | Ny                           |
| Element ratio           | Nyr                          |
| Distribution method     | Geometric sequence           |

*Distribution 4 (dis4)*

SELECTION

|                        |         |
|------------------------|---------|
| Geometric entity level | Edge    |
| Selection              | Edge 65 |

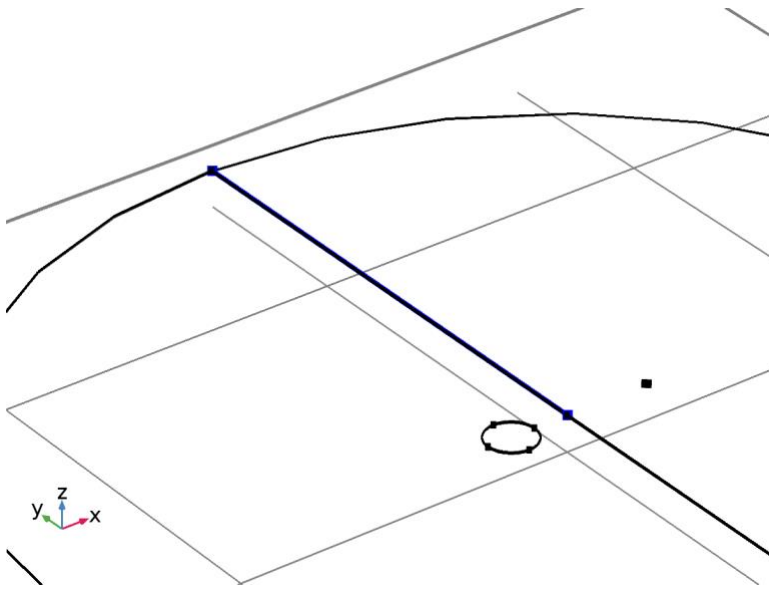

*Distribution 4*

SETTINGS

| Description             | Value                        |
|-------------------------|------------------------------|
| Distribution properties | Predefined distribution type |
| Number of elements      | Ny                           |
| Element ratio           | Nyr                          |
| Distribution method     | Geometric sequence           |

*Distribution 5 (dis5)*

SELECTION

|                        |         |
|------------------------|---------|
| Geometric entity level | Edge    |
| Selection              | Edge 51 |

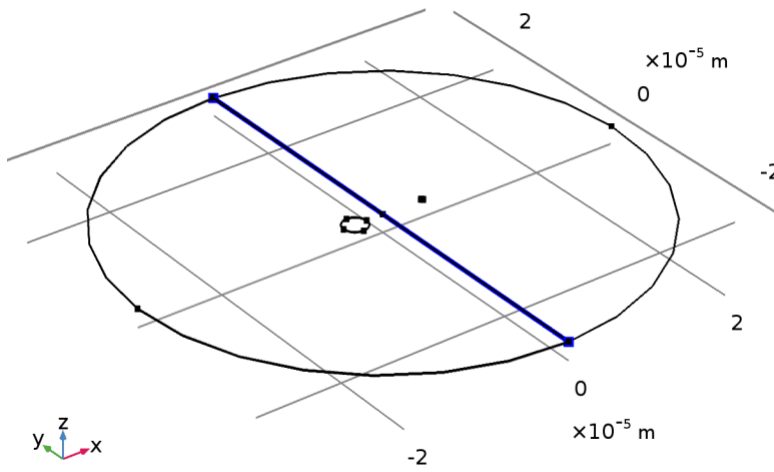

### Distribution 5

#### SETTINGS

| Description             | Value                        |
|-------------------------|------------------------------|
| Distribution properties | Predefined distribution type |
| Number of elements      | $2 \cdot N_y$                |
| Element ratio           | $N_{yr}$                     |
| Distribution method     | Geometric sequence           |
| Symmetric distribution  | On                           |
| Reverse direction       | On                           |

### 2.5.5 Free Triangular 1 (ftri1)

#### SELECTION

|                        |                   |
|------------------------|-------------------|
| Geometric entity level | Boundary          |
| Selection              | Boundaries 39, 52 |

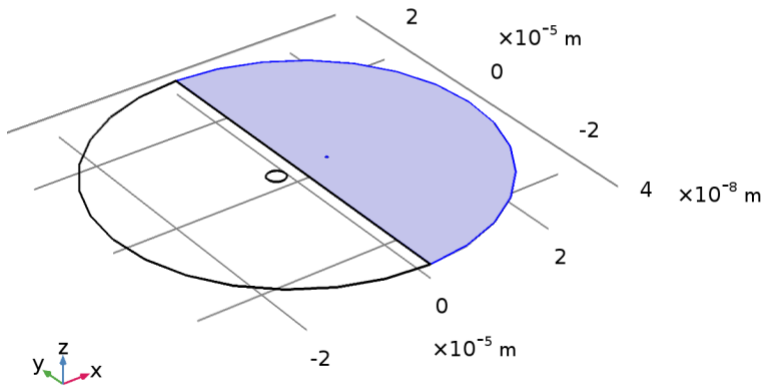

Free Triangular 1

Distribution 1 (dis1)

SELECTION

|                        |              |
|------------------------|--------------|
| Geometric entity level | Edge         |
| Selection              | Edges 62, 68 |

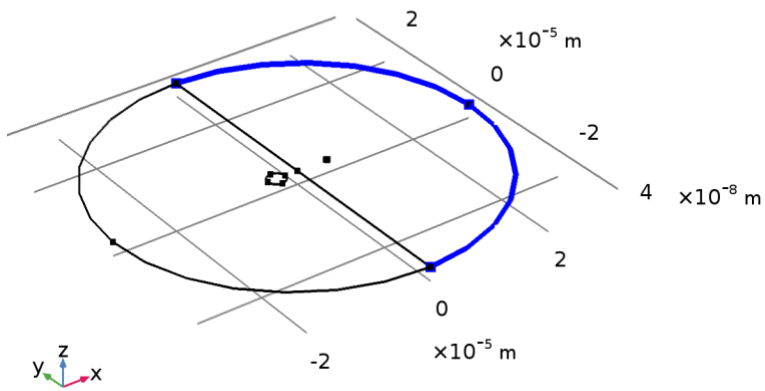

Distribution 1

SETTINGS

| Description        | Value |
|--------------------|-------|
| Number of elements | 3     |



Size 1 (size1)

SELECTION

|                        |                   |
|------------------------|-------------------|
| Geometric entity level | Boundary          |
| Selection              | Boundaries 39, 52 |

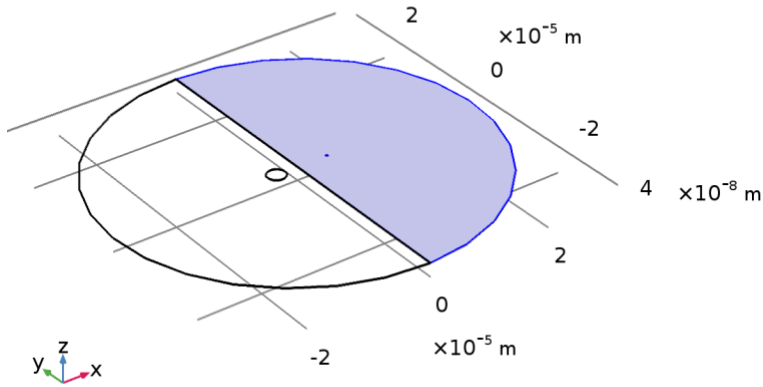

Size 1

SETTINGS

| Description                  | Value   |
|------------------------------|---------|
| Maximum element size         | 6.01E-6 |
| Maximum element size         | Off     |
| Minimum element size         | 1.08E-6 |
| Minimum element size         | Off     |
| Curvature factor             | 0.6     |
| Curvature factor             | Off     |
| Resolution of narrow regions | 0.5     |
| Resolution of narrow regions | Off     |
| Maximum element growth rate  | 1.25    |
| Custom element size          | Custom  |

2.5.6 Swept 3 (swe3)

SELECTION

|                        |              |
|------------------------|--------------|
| Geometric entity level | Domain       |
| Selection              | Domains 7–11 |

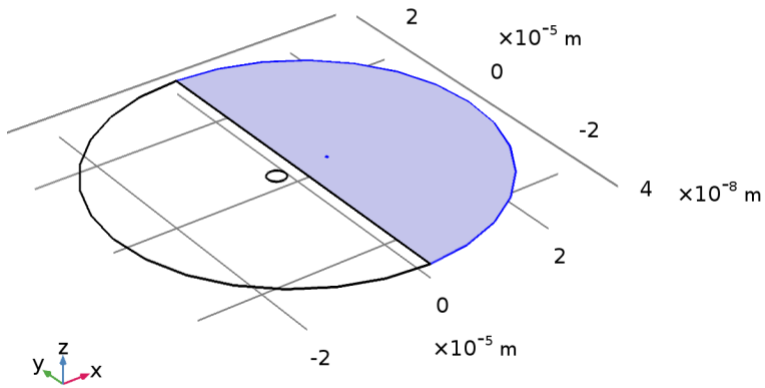

Swept 3

Distribution 1 (dis1)

SELECTION

|                        |              |
|------------------------|--------------|
| Geometric entity level | Domain       |
| Selection              | Domains 7–11 |

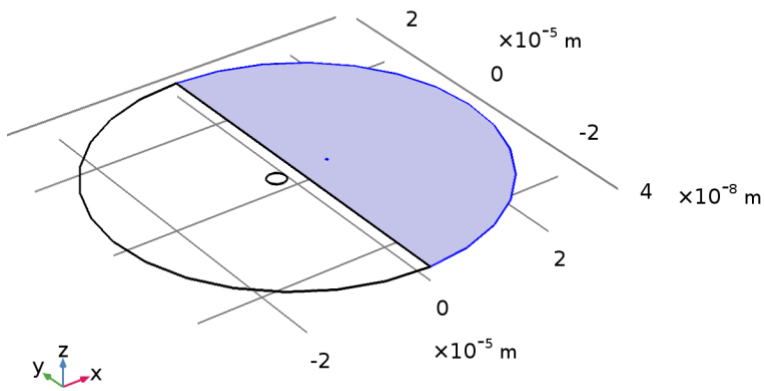

Distribution 1

SETTINGS

| Description             | Value                 |
|-------------------------|-----------------------|
| Distribution properties | Explicit distribution |

| Description                   | Value                                                                                                                                                                                                                                                                                               |
|-------------------------------|-----------------------------------------------------------------------------------------------------------------------------------------------------------------------------------------------------------------------------------------------------------------------------------------------------|
| Explicit element distribution | {0, 0.03333333333333333, 0.07017236393585487, 0.11088578920786052, 0.15588108279372723, 0.20560857271510286, 0.2605659484051071, 0.3213032417514574, 0.3884283320004732, 0.4626130296168887, 0.5445997999887868, 0.6352091942707551, 0.7353480617356363, 0.8460186258268543, 0.9683285147474958, 1} |

### 2.5.7 Mapped 3 (map3)

#### SELECTION

|                        |             |
|------------------------|-------------|
| Geometric entity level | Boundary    |
| Selection              | Boundary 24 |

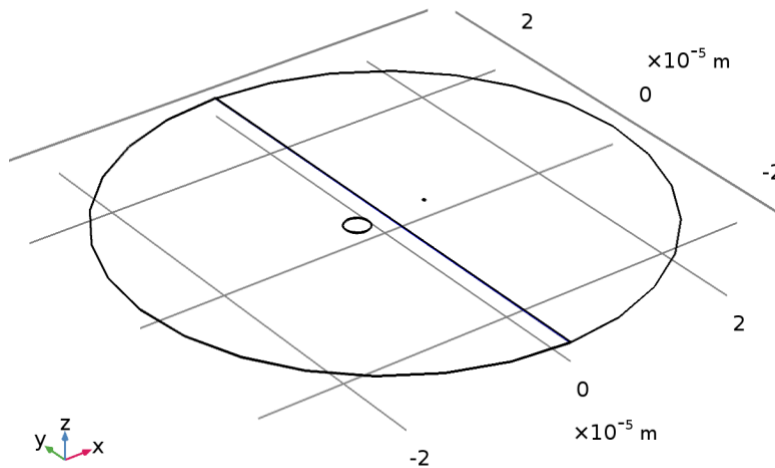

*Mapped 3*

*Distribution 1 (dis1)*

#### SELECTION

|                        |         |
|------------------------|---------|
| Geometric entity level | Edge    |
| Selection              | Edge 34 |

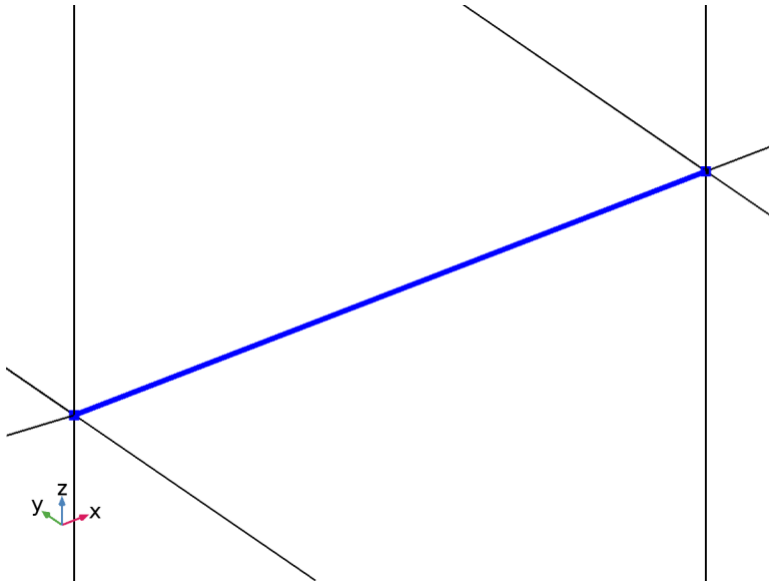

*Distribution 1*

SETTINGS

| Description                   | Value                                                                                                                                                                                                                                                                                               |
|-------------------------------|-----------------------------------------------------------------------------------------------------------------------------------------------------------------------------------------------------------------------------------------------------------------------------------------------------|
| Distribution properties       | Explicit distribution                                                                                                                                                                                                                                                                               |
| Explicit element distribution | {0, 0.03333333333333333, 0.07017236393585487, 0.11088578920786052, 0.15588108279372723, 0.20560857271510286, 0.2605659484051071, 0.3213032417514574, 0.3884283320004732, 0.4626130296168887, 0.5445997999887868, 0.6352091942707551, 0.7353480617356363, 0.8460186258268543, 0.9683285147474958, 1} |

*Distribution 2 (dis2)*

SELECTION

|                        |         |
|------------------------|---------|
| Geometric entity level | Edge    |
| Selection              | Edge 33 |

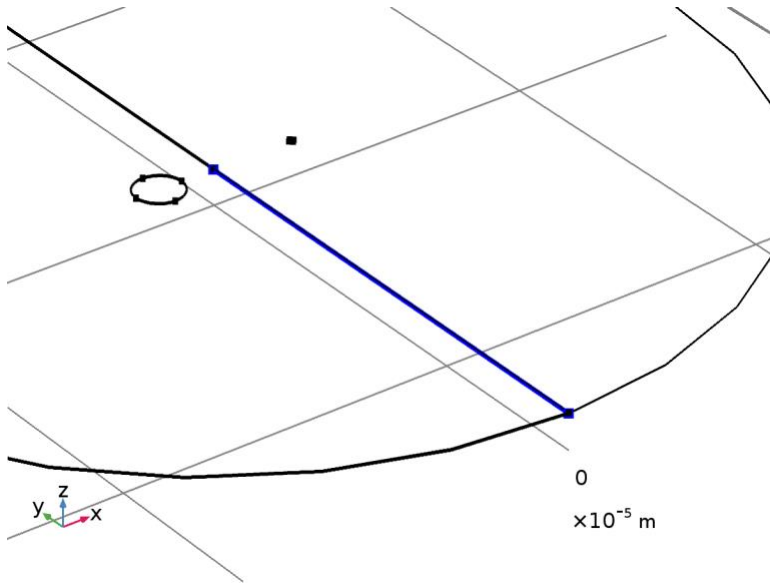

*Distribution 2*

SETTINGS

| Description             | Value                        |
|-------------------------|------------------------------|
| Distribution properties | Predefined distribution type |
| Number of elements      | Ny                           |
| Element ratio           | Nyr                          |
| Distribution method     | Geometric sequence           |

*Distribution 3 (dis3)*

SELECTION

|                        |         |
|------------------------|---------|
| Geometric entity level | Edge    |
| Selection              | Edge 40 |

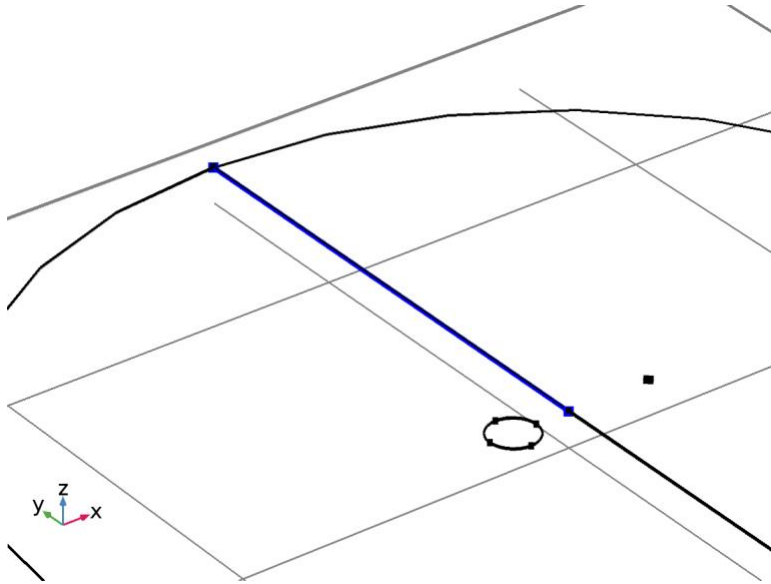

*Distribution 3*

SETTINGS

| Description             | Value                        |
|-------------------------|------------------------------|
| Distribution properties | Predefined distribution type |
| Number of elements      | Ny                           |
| Element ratio           | Nyr                          |
| Distribution method     | Geometric sequence           |

2.5.8 Free Triangular 2 (ftri2)

SELECTION

|                        |                  |
|------------------------|------------------|
| Geometric entity level | Boundary         |
| Selection              | Boundaries 6, 13 |

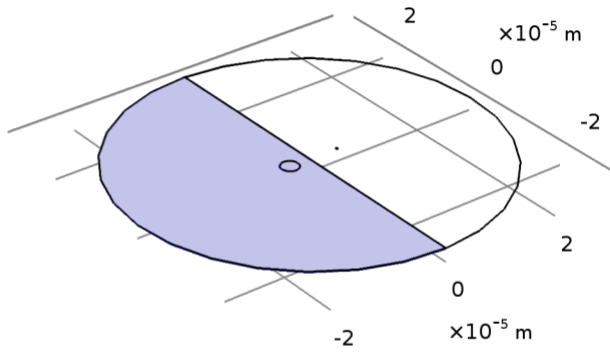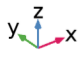

Free Triangular 2

Distribution 1 (dis1)

SELECTION

|                        |                          |
|------------------------|--------------------------|
| Geometric entity level | Edge                     |
| Selection              | Edges 5-6, 13-14, 20, 25 |

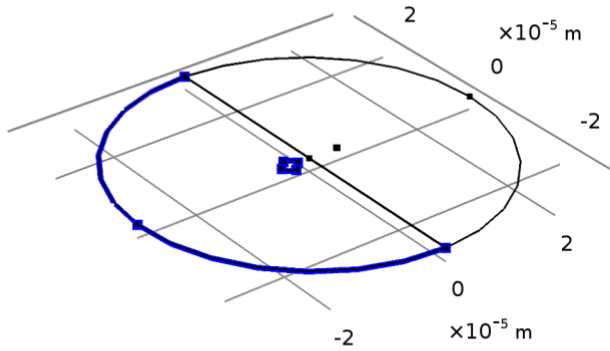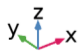

Distribution 1

SETTINGS

| Description        | Value |
|--------------------|-------|
| Number of elements | 3     |

Size 1 (size1)

SELECTION

|                        |               |
|------------------------|---------------|
| Geometric entity level | Boundary      |
| Selection              | No boundaries |

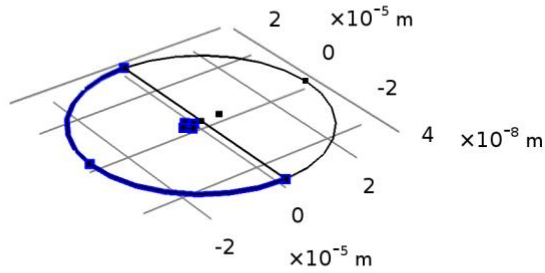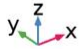

Size 1

SETTINGS

| Description                  | Value   |
|------------------------------|---------|
| Maximum element size         | 6.0E-6  |
| Maximum element size         | Off     |
| Minimum element size         | 1.08E-6 |
| Minimum element size         | Off     |
| Curvature factor             | 0.6     |
| Curvature factor             | Off     |
| Resolution of narrow regions | 0.5     |
| Resolution of narrow regions | Off     |
| Maximum element growth rate  | 1.25    |
| Custom element size          | Custom  |

2.5.9 Swept 1 (swe1)

SELECTION

|                        |                 |
|------------------------|-----------------|
| Geometric entity level | Domain          |
| Selection              | Domains 1, 3, 5 |



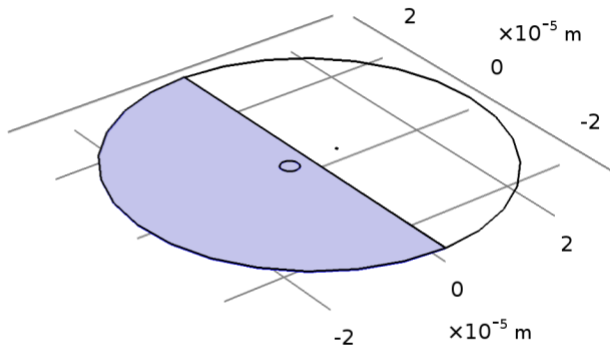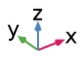

Swept 1

Distribution 1 (dis1)

SELECTION

|                        |              |
|------------------------|--------------|
| Geometric entity level | Domain       |
| Selection              | Domains 1, 5 |

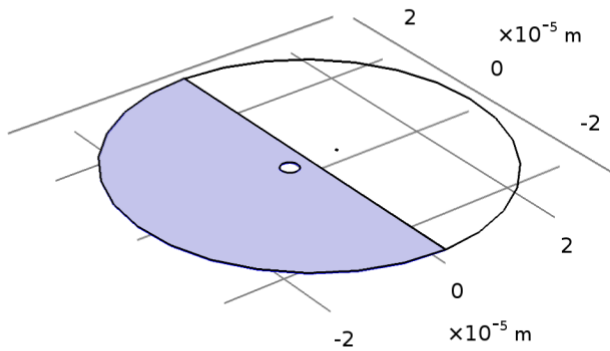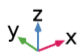

Distribution 1

SETTINGS

| Description             | Value                 |
|-------------------------|-----------------------|
| Distribution properties | Explicit distribution |

| Description                   | Value                                                                                                                                                                                                                                                                                               |
|-------------------------------|-----------------------------------------------------------------------------------------------------------------------------------------------------------------------------------------------------------------------------------------------------------------------------------------------------|
| Explicit element distribution | {0, 0.03333333333333333, 0.07017236393585487, 0.11088578920786052, 0.15588108279372723, 0.20560857271510286, 0.2605659484051071, 0.3213032417514574, 0.3884283320004732, 0.4626130296168887, 0.5445997999887868, 0.6352091942707551, 0.7353480617356363, 0.8460186258268543, 0.9683285147474958, 1} |

### 2.5.10 Swept 2 (swe2)

#### SELECTION

|                        |           |
|------------------------|-----------|
| Geometric entity level | Domain    |
| Selection              | Remaining |

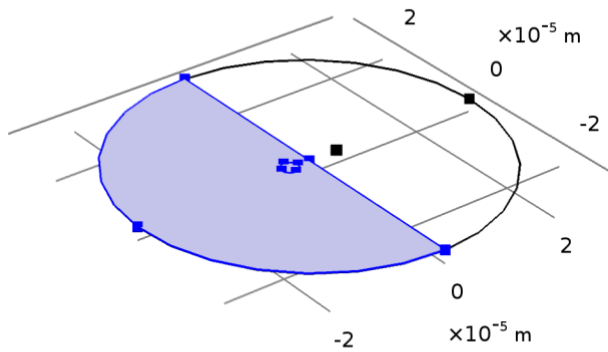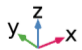

*Swept 2*

*Distribution 1 (dis1)*

#### SELECTION

|                        |          |
|------------------------|----------|
| Geometric entity level | Domain   |
| Selection              | Domain 6 |

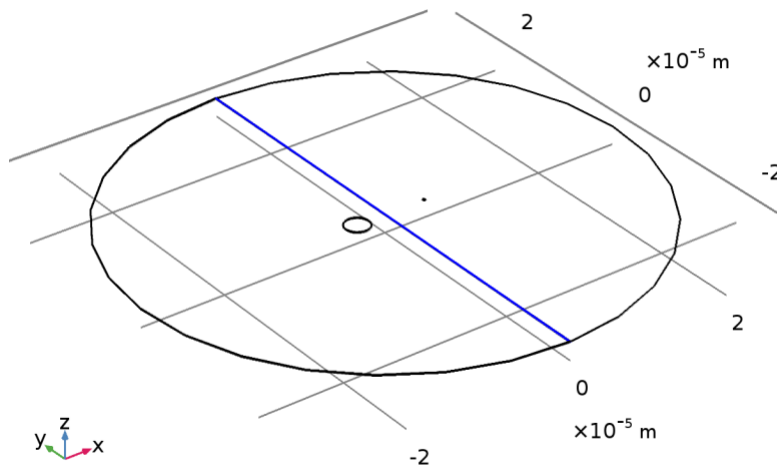

Distribution 1

#### SETTINGS

| Description                   | Value                                                                                                                                                                                                                                                                                                                                                                                                                  |
|-------------------------------|------------------------------------------------------------------------------------------------------------------------------------------------------------------------------------------------------------------------------------------------------------------------------------------------------------------------------------------------------------------------------------------------------------------------|
| Distribution properties       | Explicit distribution                                                                                                                                                                                                                                                                                                                                                                                                  |
| Explicit element distribution | {0, 0.015625, 0.03289329559493197, 0.05197771369118462, 0.07306925755955963, 0.09637901846020447, 0.12214028831489397, 0.15061089457099563, 0.18207578062522184, 0.2168498576329166, 0.25528115624474385, 0.2977543098144165, 0.3446944039385795, 0.39657123085633794, 0.45390399128788866, 0.5172664907698366, 0.5872928824938688, 0.6646840141250425, 0.7502144421207798, 0.8447401837522321, 0.9492072844128455, 1} |

### 3 Study 1

#### COMPUTATION INFORMATION

|                  |                                                    |
|------------------|----------------------------------------------------|
| Computation time | 27 h 17 min 6 s                                    |
| CPU              | Intel(R) Xeon(R) CPU E3-1270 v5 @ 3.60GHz, 4 cores |
| Operating system | Windows 7                                          |

#### 3.1 PIPET TRANSLATION

| Parameter name | Parameter value list | Parameter unit |
|----------------|----------------------|----------------|
| xp             | range(1,1,15)        | um             |

#### STUDY SETTINGS

| Description          | Value                  |
|----------------------|------------------------|
| Sweep type           | Specified combinations |
| Parameter name       | xp                     |
| Parameter value list | range(1, 1, 15)        |
| Unit                 | um                     |

#### 3.2 STATIONARY

#### STUDY SETTINGS

| Description                    | Value |
|--------------------------------|-------|
| Include geometric nonlinearity | Off   |

#### PHYSICS AND VARIABLES SELECTION

| Physics interface     | Discretization |
|-----------------------|----------------|
| Poisson-Boltzmann (p) | physics        |
| Drift-Diffusion (C)   | physics        |

#### MESH SELECTION

| Geometry           | Mesh  |
|--------------------|-------|
| Geometry 1 (geom1) | mesh1 |

#### STUDY EXTENSIONS

| Description          | Value                  |
|----------------------|------------------------|
| Auxiliary sweep      | On                     |
| Sweep type           | Specified combinations |
| Parameter value list | range(0, -1, -8)       |

### 3.3 SOLVER CONFIGURATIONS

#### 3.3.1 Solution 1

*Compile Equations: Stationary (st1)*

##### STUDY AND STEP

| Description    | Value      |
|----------------|------------|
| Use study      | Study 1    |
| Use study step | Stationary |

*Dependent Variables 1 (v1)*

##### GENERAL

| Description           | Value      |
|-----------------------|------------|
| Defined by study step | Stationary |

##### INITIAL VALUE CALCULATION CONSTANTS

| Description                  | Value                                |
|------------------------------|--------------------------------------|
| Parameter initial value list | range(0, -1, -8)[mC/m <sup>2</sup> ] |

**Dependent variable Ch (comp1.Ch) (comp1\_Ch)**

##### GENERAL

| Description      | Value    |
|------------------|----------|
| Field components | comp1.Ch |

**Dependent variable phi (comp1.phi) (comp1\_phi)**

##### GENERAL

| Description      | Value     |
|------------------|-----------|
| Field components | comp1.phi |

*Stationary Solver 1 (s1)*

##### GENERAL

| Description           | Value      |
|-----------------------|------------|
| Defined by study step | Stationary |

##### RESULTS WHILE SOLVING

| Description | Value |
|-------------|-------|
| Probes      | None  |

**Parametric 1 (p1)**

##### GENERAL

| Description           | Value            |
|-----------------------|------------------|
| Defined by study step | Stationary       |
| Parameter value list  | range(0, -1, -8) |

### Segregated 1 (se1)

#### Segregated Step 1 (ss1)

##### GENERAL

| Description   | Value                            |
|---------------|----------------------------------|
| Variables     | Dependent variable Ch (comp1.Ch) |
| Linear solver | Direct                           |

#### Segregated Step 2 (ss2)

##### GENERAL

| Description   | Value                              |
|---------------|------------------------------------|
| Variables     | Dependent variable phi (comp1.phi) |
| Linear solver | Direct                             |

### 3.3.2 Parametric Solutions 1

#### *xp=1 (su1)*

##### GENERAL

| Description | Value |
|-------------|-------|
| Solution    | xp=1  |

#### *xp=2 (su2)*

##### GENERAL

| Description | Value |
|-------------|-------|
| Solution    | xp=2  |

#### *xp=3 (su3)*

##### GENERAL

| Description | Value |
|-------------|-------|
| Solution    | xp=3  |

#### *xp=4 (su4)*

##### GENERAL

| Description | Value |
|-------------|-------|
| Solution    | xp=4  |

*xp=5 (su5)*

GENERAL

| Description | Value |
|-------------|-------|
| Solution    | xp=5  |

*xp=6 (su6)*

GENERAL

| Description | Value |
|-------------|-------|
| Solution    | xp=6  |

*xp=7 (su7)*

GENERAL

| Description | Value |
|-------------|-------|
| Solution    | xp=7  |

*xp=8 (su8)*

GENERAL

| Description | Value |
|-------------|-------|
| Solution    | xp=8  |

*xp=9 (su9)*

GENERAL

| Description | Value |
|-------------|-------|
| Solution    | xp=9  |

*xp=10 (su10)*

GENERAL

| Description | Value |
|-------------|-------|
| Solution    | xp=10 |

*xp=11 (su11)*

GENERAL

| Description | Value |
|-------------|-------|
| Solution    | xp=11 |

*xp=12 (su12)*

GENERAL

| Description | Value |
|-------------|-------|
| Solution    | xp=12 |

*xp=13 (su13)*

GENERAL

| Description | Value |
|-------------|-------|
| Solution    | xp=13 |

*xp=14 (su14)*

GENERAL

| Description | Value |
|-------------|-------|
| Solution    | xp=14 |

*xp=15 (su15)*

GENERAL

| Description | Value |
|-------------|-------|
| Solution    | xp=15 |
